# Supplementary material
Source: publisher site journal article supplement (https://www.spandidos-publications.com/2528/downloadSupplementary)

Table SI. Baseline characteristics of patients and volunteers.

| Characteristics | Patients, n=24 | Volunteers, n=24 |
|-----------------|----------------|------------------|
| Age             | 24.71±2.37     | 25.33±2.51       |
| Weight (kg)     | 76.25±9.60     | 70.71±6.85       |
| Waist (cm)      | 96.36±8.36     | 92.55±8.89       |

Figure S1. Structure of the GV287 vector. LTR, long terminal repeat; pUbi, ubiquitin promoter; MCS, multiple cloning site; 3FLAG, three tandem FLAG epitope tags; pSV40, simian virus 40 promoter; EGFP, enhanced green fluorescent protein; PloyA, polyadenylic acid; pBR ori, pBR322 origin; Amp<sup>r</sup>, ampicillin resistance gene; p CMV, cytomegalovirus immediate/early promoter.

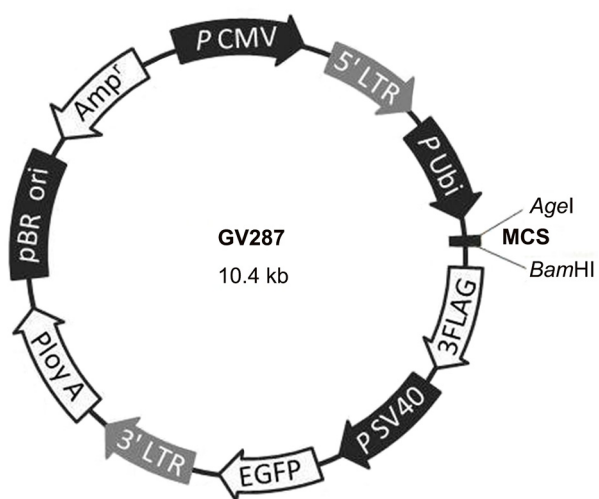

Figure S2. IGF-1 levels in KGN cells following transfection with IGF-1 overexpression vector. (A) Relative IGF-1 mRNA and (B) protein expression. \*\*\* $P < 0.001$ . Cells transfected with empty vector were used as negative control. IGF-1, insulin-like growth factor-1. ly promoter.

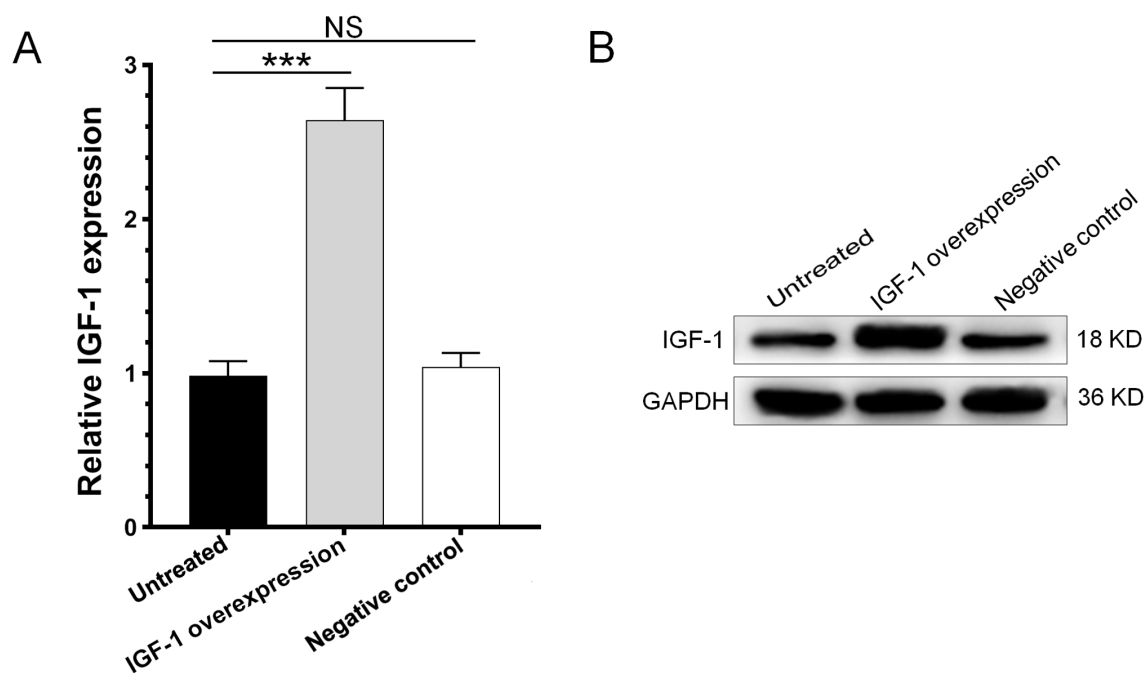

Supplement: Supplementary file 1 [file downloadSupplementary]
